# Supplementary material for: Cost-effectiveness and budget impact analyses of a colorectal cancer screening programme in a high adenoma prevalence scenario using MISCAN-Colon microsimulation model
Source: Springer Nature journal article supplement (doi:10.1186/s12885-018-4362-1), 2018-04-25

*Table S1. European guidelines for surveillance schedule after colonoscopy adapted to the size-dependent classification used in the model.*

| Category            | Colonoscopy result                            | Next test                | Time     |
|---------------------|-----------------------------------------------|--------------------------|----------|
| Normal              | No adenoma detection<br>(age 50-59)           | FIT (programme)          | 10 years |
| Low-risk adenoma    | 1-2 adenomas smaller than 1 cm<br>(age 50-64) | FIT (programme)          | 5 years  |
| Medium-risk adenoma | >2 adenomas smaller than 1 cm<br>(age 50-71)  | Surveillance colonoscopy | 3 years  |
| High-risk adenoma   | 1 adenoma larger than 1 cm<br>(age 50-73)     | Surveillance colonoscopy | 1 year   |

FIT = faecal immunological testing

*Table S2. Test characteristics by sex fitted to the positivity and detection rates of advanced neoplasia observed in the Basque programme between 2011 and 2012.*

|                         | FIT in Men | FIT in Women |
|-------------------------|------------|--------------|
| Base case               |            |              |
| Normal                  | 0.0396     | 0.0297       |
| Adenomas < 5 mm         | 0.000      | 0.000        |
| Adenomas 6-9 mm         | 0.043      | 0.050        |
| Adenomas >= 10 mm       | 0.216      | 0.113        |
| CRC type A              | 0.706      | 0.720        |
| CRC type B              | 0.341      | 0.357        |
| Correlated test results |            |              |
| Normal*                 | 0.0429     | 0.0317       |
| Adenomas < 5 mm         | 0.000      | 0.000        |
| Adenomas 6-9 mm**       | 0.047      | 0.049        |
| Adenomas >= 10 mm**     | 0.228      | 0.116        |
| CRC type A              | 0.706      | 0.719        |
| CRC type B              | 0.340      | 0.355        |

\*Probability of systematic false positive result. 0.0127. [40] \*\*Probability of systematic negative result in adenomas: 0.7313 (6-9 mm), 0.2602 (>10 mm) [40]. FIT = faecal immunological testing; CRC = colorectal cancer

*Table S3. Generalized liner model applied to estimate annual follow-up cost in patients with metastatic colorectal cancer.*

| Parameters                   | Coefficients | p-value |
|------------------------------|--------------|---------|
| Constant                     | 5470.40      | < 0.001 |
| Follow-up (years)            | 3366.90      | < 0.001 |
| Estimated mean cost per year | 24254.90     |         |

\*Familia: Gamma; Función link: Potencia 0.9.

*Table S4. Disutility values used in the model for colonoscopy, its complications and four cancer states depending on cancer detection stage.*

|                  |                                | Disutilities |
|------------------|--------------------------------|--------------|
| Colonoscopy      |                                | 0.0055       |
| Complication     |                                | 0.0384       |
| CRC in Stage I   | Initial phase                  | 0.12         |
|                  | Follow-up                      | 0.05         |
|                  | Terminal phase by CRC          | 0.70         |
|                  | Terminal phase by other causes | 0.05         |
| CRC in Stage II  | Initial phase                  | 0.18         |
|                  | Follow-up                      | 0.05         |
|                  | Terminal phase by CRC          | 0.70         |
|                  | Terminal phase by other causes | 0.05         |
| CRC in Stage III | Initial phase                  | 0.24         |
|                  | Follow-up                      | 0.24         |
|                  | Terminal phase by CRC          | 0.70         |
|                  | Terminal phase by other causes | 0.24         |
| CRC in Stage IV  | Initial phase                  | 0.70         |
|                  | Follow-up                      | 0.70         |
|                  | Terminal phase by CRC          | 0.70         |
|                  | Terminal phase by other causes | 0.70         |

CRC = colorectal cancer

Table S5. Budget impact analysis of the colorectal cancer programme in million euros.

| Year | Screened population |                    |           | Unscreened population |                    |           |              |
|------|---------------------|--------------------|-----------|-----------------------|--------------------|-----------|--------------|
|      | Screening           | Clinical diagnosis | Treatment | Total costs           | Clinical diagnosis | Treatment | Total costs* |
| 2009 | 0.68                | 0.85               | 60.9      | 62.5                  | 0.9                | 60.3      | 61.1         |
| 2010 | 2.75                | 0.86               | 63.5      | 67.1                  | 0.9                | 61.2      | 62.0         |
| 2011 | 3.37                | 0.86               | 64.5      | 68.7                  | 0.9                | 62.5      | 63.4         |
| 2012 | 5.17                | 0.83               | 65.5      | 71.5                  | 0.9                | 62.7      | 63.6         |
| 2013 | 7.93                | 0.81               | 67.7      | 76.4                  | 0.9                | 63.4      | 64.4         |
| 2014 | 5.75                | 0.80               | 64.6      | 71.1                  | 0.9                | 64.8      | 65.7         |
| 2015 | 7.54                | 0.78               | 65.4      | 73.7                  | 0.9                | 65.1      | 66.0         |
| 2020 | 8.69                | 0.77               | 65.5      | 75.0                  | 1.0                | 71.0      | 72.0         |
| 2025 | 9.02                | 0.74               | 63.4      | 73.2                  | 1.1                | 73.8      | 74.8         |
| 2030 | 9.30                | 0.75               | 63.9      | 74.0                  | 1.1                | 78.1      | 79.2         |
| 2035 | 8.87                | 0.75               | 63.5      | 73.1                  | 1.1                | 80.7      | 81.9         |
| 2038 | 8.43                | 0.75               | 63.7      | 72.9                  | 1.2                | 81.7      | 82.9         |

\*No screening costs in the unscreened population

Figure S1. Number of invited and participant population: Observed data in the Basque Screening Programme Versus Simulated by MISCAN-Colon.

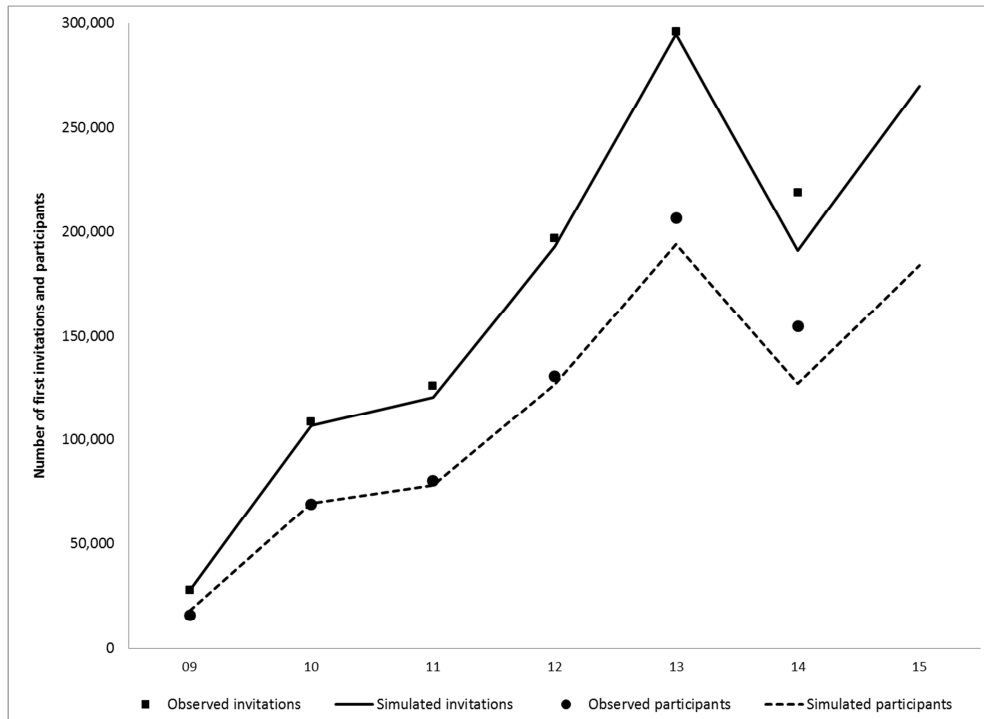

Figure S2. Number of detected adenomas and cases of cancer: Observed data in the Basque Screening Programme Versus Simulated by MISCAN-Colon.

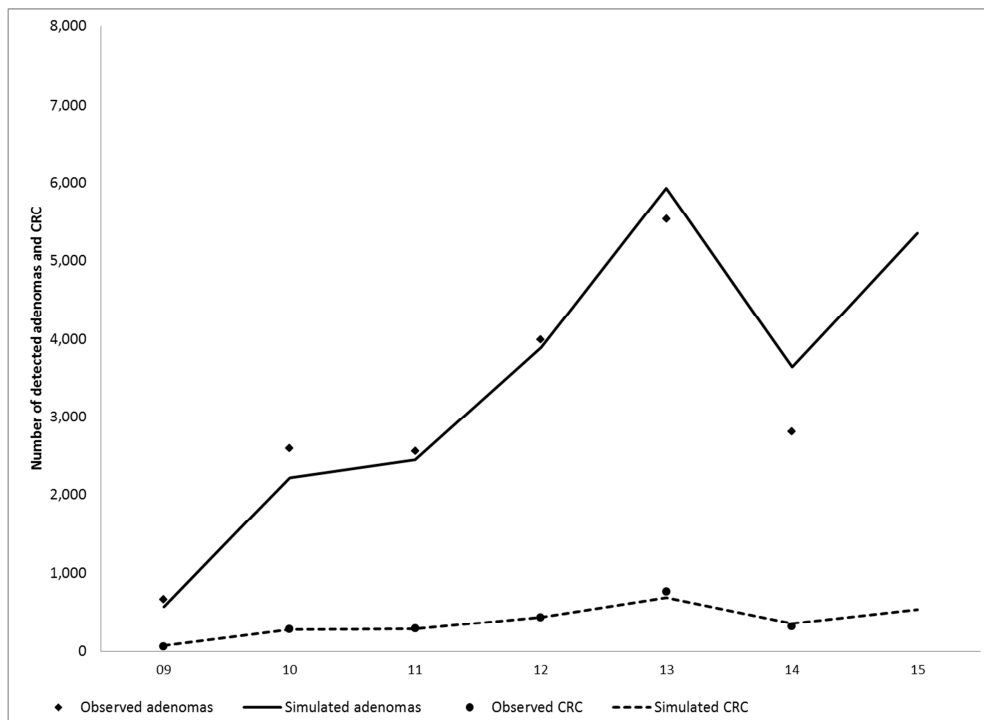

Figure S3: Predicted number of diagnostic and total colonoscopies needed each year in base-case and low prevalence scenarios.

A) Independent successive screening tests

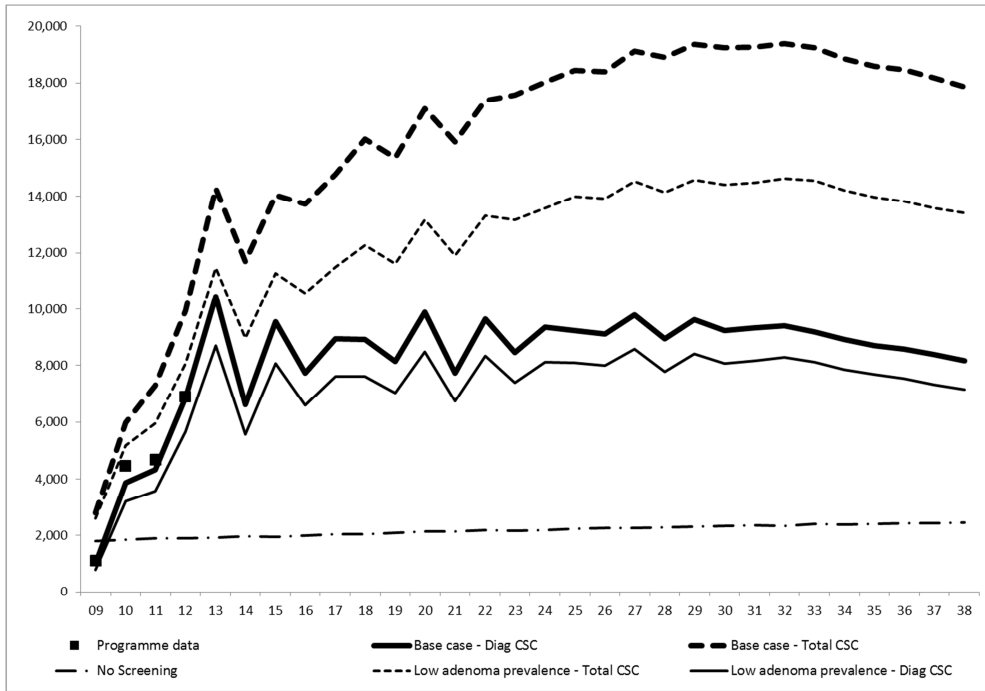

B) Correlated successive screening tests.

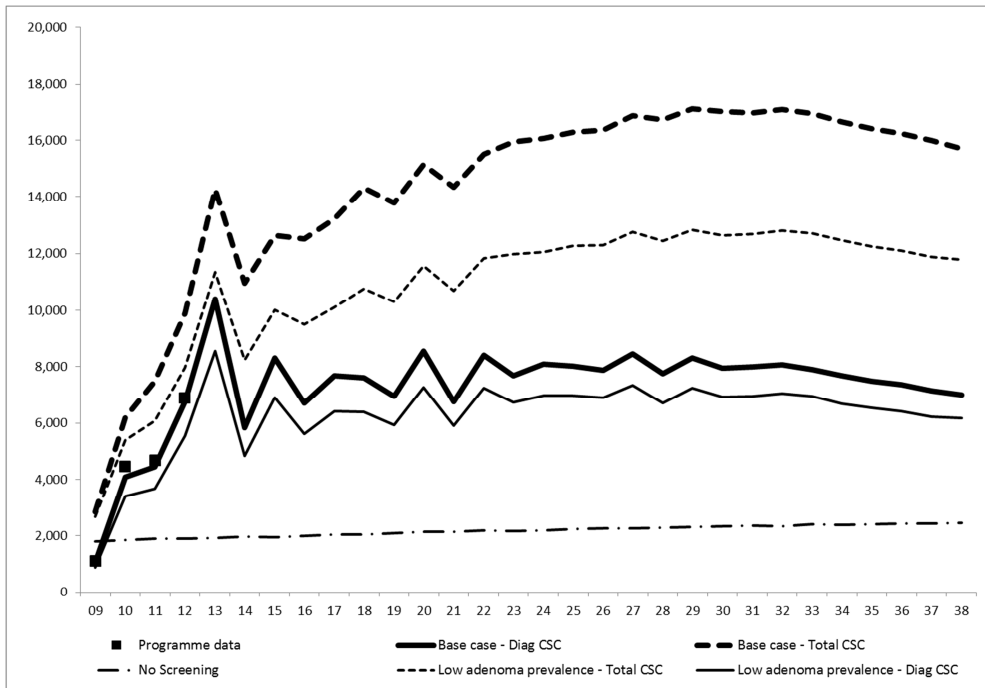

Figure S4. Budget impact analysis for base case and lower adenoma prevalence scenarios.

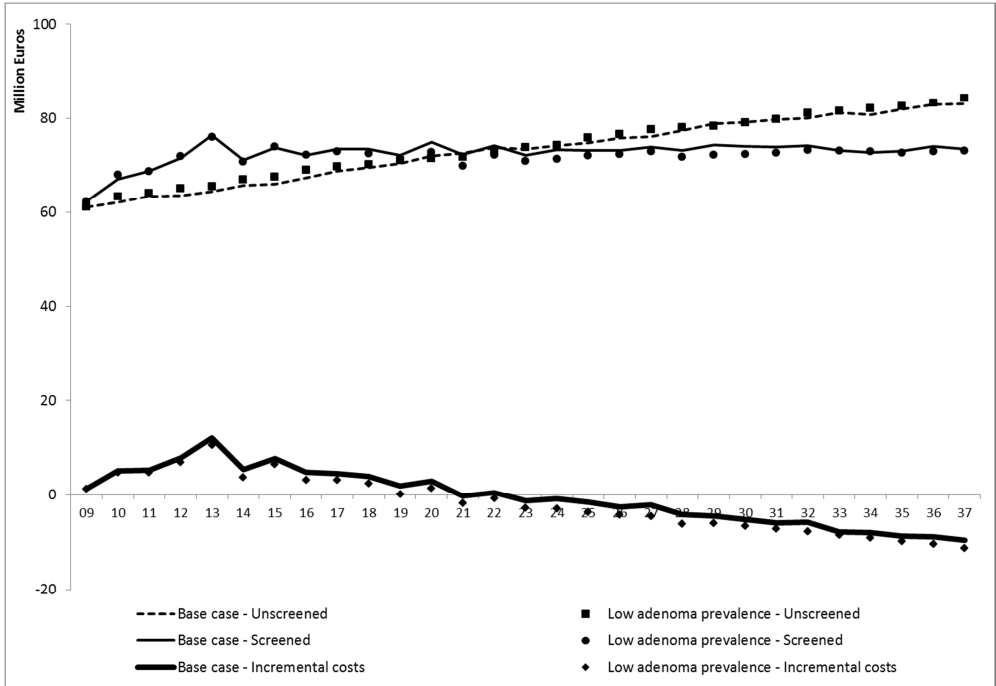

Supplement: MOESM2 [file 15718322]
